# Supplementary material for: High-throughput m6A-seq reveals RNA m6A methylation patterns in the chloroplast and mitochondria transcriptomes of Arabidopsis thaliana
Source: PubMed Central journal article supplement (PMC5683568; doi:10.1371/journal.pone.0185612), 2017-11-13
Supplement: pone.0185612.s001.pdf [file pone.0185612.s001.pdf]

**A For total RNA**

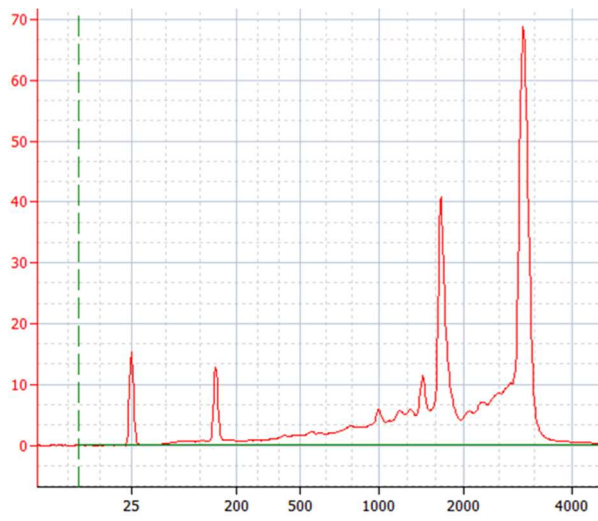

**B For RIP RNA sample**

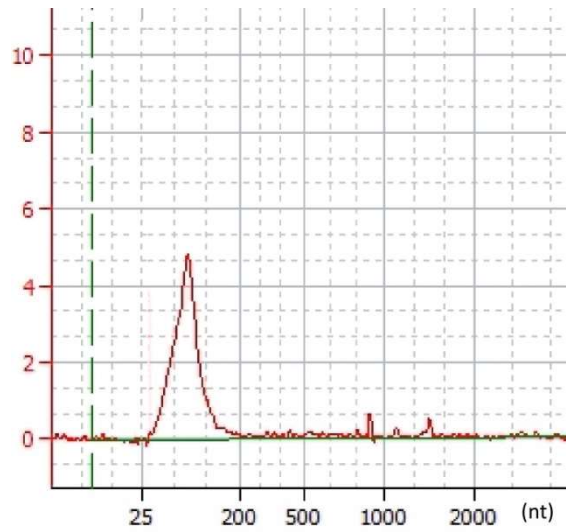

**S1 Fig. RNA QC results of the total RNA and RNA for m<sup>6</sup>A-seq samples.**

(A) RNA quality of the total RNA for the RNA-seq sample was high with RIN over 8.5. (B) RNA fragmentation for the m<sup>6</sup>A-seq samples was consistent in the RIP experiments, with an average length of 106 nt.
