# Supplementary material for: High-throughput m6A-seq reveals RNA m6A methylation patterns in the chloroplast and mitochondria transcriptomes of Arabidopsis thaliana
Source: PubMed Central journal article supplement (PMC5683568; doi:10.1371/journal.pone.0185612), 2017-11-13
Supplement: pone.0185612.s003.pdf [file pone.0185612.s003.pdf]

**S1 Table.** The primers used for qRT-PCR

| Gene ID       | Forward primers           | Reverse primers                 |
|---------------|---------------------------|---------------------------------|
| ATCG00360     | GGCATTAGAACGAAACCCCTT     | TGGCCTGTTCTCCACGGTAA            |
| ATCG00830     | ACCGATATGCCCTTAGGCAC      | TCAGTTTCGCTACAGCACCC            |
| ATCG00890     | GGTCTACGTACCGGAACTGAT     | ACATAGAGCTAAAGAGAGAGCCA         |
| ATMG00510     | CACGATTAGTATTGGAAATGAACGG | TCTATTAATTTCTCAGTCCCTCTA<br>TGG |
| ATMG00513     | GGCTCTCGGGAGTCTCTTTG      | TACCGAGCAGGGGCAAAAAT            |
| ATMG00580     | TGTTTTTCCCGAAAGCGTGC      | TCTTTCTTTGTCTCGAACCCCA          |
| AT3G18780-    | TCGCCATCCAAGCTGTTC        | ACACCATCACCAGAATCCAG            |
| <i>Actin2</i> |                           |                                 |
