# Supplementary material for: High-throughput m6A-seq reveals RNA m6A methylation patterns in the chloroplast and mitochondria transcriptomes of Arabidopsis thaliana
Source: PubMed Central journal article supplement (PMC5683568; doi:10.1371/journal.pone.0185612), 2017-11-13
Supplement: pone.0185612.s004.pdf [file pone.0185612.s004.pdf]

**S2 Table.** The sequenced and mapped reads in the m<sup>6</sup>A-seq, mRNA-seq and input RNA-seq samples

| Replicate   | Samples     | Tissues | Category             | Clean reads after<br>a removal of<br>adaptors | Mapped reads | Mapped reads of<br>the transcripts in<br>chloroplast | Mapped reads of<br>the transcripts in<br>chloroplast |
|-------------|-------------|---------|----------------------|-----------------------------------------------|--------------|------------------------------------------------------|------------------------------------------------------|
| Replicate 1 | zhwA01      | Leaf    | m <sup>6</sup> A-seq | 134,797,106                                   | 87,455,788   | 6,977,682                                            | 135,580                                              |
|             | zhwF15      | Flower  | m <sup>6</sup> A-seq | 115,165,660                                   | 33,489,846   | 411,880                                              | 124,614                                              |
|             | zhwRoot8    | Root    | m <sup>6</sup> A-seq | 104,774,124                                   | 75,518,793   | 530,572                                              | 313,220                                              |
|             | zhwLD24     | Leaf    | mRNA-seq             | 77,905,520                                    | 73,460,466   | 91,312                                               | 8,404                                                |
|             | zhwF15      | Flower  | mRNA-seq             | 60,349,042                                    | 57,139,889   | 11,534                                               | 13,404                                               |
|             | zhwRoot8CK  | Root    | mRNA-seq             | 92,491,920                                    | 87,205,832   | 19,640                                               | 125,820                                              |
|             | Leaf_rep1   | Leaf    | Input, RNA-seq       | 51,074,102                                    | 7,783,758    |                                                      |                                                      |
|             | Flower_rep1 | Flower  | Input, RNA-seq       | 33,603,842                                    | 19,817,745   |                                                      |                                                      |
|             | Root_rep1   | Root    | Input, RNA-seq       | 31,656,580                                    | 16,944,034   |                                                      |                                                      |
| Replicate 2 | LE03        | Leaf    | m <sup>6</sup> A-seq | 90,726,318                                    | 70,600,665   | 70,522                                               | 22,792                                               |
|             | F23         | Flower  | m <sup>6</sup> A-seq | 165,894,986                                   | 125,665,375  | 54,370                                               | 25,258                                               |
|             | R07         | Root    | m <sup>6</sup> A-seq | 156,536,156                                   | 125,893,506  | 50,732                                               | 34,016                                               |
|             | L1          | Leaf    | mRNA-seq             | 59,673,962                                    | 53,807,285   | 44,644                                               | 13,572                                               |
|             | F1          | Flower  | mRNA-seq             | 48,964,626                                    | 40,562,265   | 22,644                                               | 23,830                                               |
|             | R1          | Root    | mRNA-seq             | 48,106,874                                    | 39,923,446   | 7,068                                                | 80,622                                               |
|             | Leaf_rep2   | Leaf    | Input, RNA-seq       | 53,643,026                                    | 9,208,929    |                                                      |                                                      |
|             | Flower_rep2 | Flower  | Input, RNA-seq       | 25,613,866                                    | 16,322,980   |                                                      |                                                      |
|             | Root_rep2   | Root    | Input, RNA-seq       | 30,648,326                                    | 16,678,032   |                                                      |                                                      |
