# Supplementary material for: High-throughput m6A-seq reveals RNA m6A methylation patterns in the chloroplast and mitochondria transcriptomes of Arabidopsis thaliana
Source: PubMed Central journal article supplement (PMC5683568; doi:10.1371/journal.pone.0185612), 2017-11-13
Supplement: pone.0185612.s005.pdf [file pone.0185612.s005.pdf]

**S3 Table.** Number of m<sup>6</sup>A sites detected in the three organs of the *Arabidopsis* chloroplast/amyloplast

| Replicates   |                                                        | Leaves | Flowers | Roots |
|--------------|--------------------------------------------------------|--------|---------|-------|
| Replicate 01 | Number of the m <sup>6</sup> A transcripts             | 117    | 109     | 110   |
|              | Total m <sup>6</sup> A sites                           | 700    | 637     | 652   |
|              | m <sup>6</sup> A sites per m <sup>6</sup> A transcript | 6.0    | 5.8     | 5.9   |
| Replicate 02 | Number of the m <sup>6</sup> A transcripts             | 98     | 100     | 92    |
|              | Total m <sup>6</sup> A sites                           | 544    | 525     | 503   |
|              | m <sup>6</sup> A sites per m <sup>6</sup> A transcript | 5.6    | 5.3     | 5.5   |
