# Supplementary material for: High-throughput m6A-seq reveals RNA m6A methylation patterns in the chloroplast and mitochondria transcriptomes of Arabidopsis thaliana
Source: PubMed Central journal article supplement (PMC5683568; doi:10.1371/journal.pone.0185612), 2017-11-13
Supplement: pone.0185612.s006.pdf [file pone.0185612.s006.pdf]

**S4 Table.** Number of m<sup>6</sup>A sites detected in the three organs of the *Arabidopsis* mitochondria

| Replicates   |                                                        | Leaves | Flowers | Roots |
|--------------|--------------------------------------------------------|--------|---------|-------|
| Replicate 01 | Number of the m <sup>6</sup> A transcripts             | 59     | 68      | 83    |
|              | Total m <sup>6</sup> A sites                           | 257    | 355     | 427   |
|              | m <sup>6</sup> A sites per m <sup>6</sup> A transcript | 4.5    | 5.2     | 5.1   |
| Replicate 02 | Number of the m <sup>6</sup> A transcripts             | 66     | 72      | 82    |
|              | Total m <sup>6</sup> A sites                           | 315    | 338     | 383   |
|              | m <sup>6</sup> A sites per m <sup>6</sup> A transcript | 4.7    | 4.7     | 4.7   |
