# Supplementary material for: High-throughput m6A-seq reveals RNA m6A methylation patterns in the chloroplast and mitochondria transcriptomes of Arabidopsis thaliana
Source: PubMed Central journal article supplement (PMC5683568; doi:10.1371/journal.pone.0185612), 2017-11-13
Supplement: pone.0185612.s007.pdf [file pone.0185612.s007.pdf]

**S5 Table.** Category of the modified transcripts based on the number of m<sup>6</sup>A sites per transcript in the chloroplast/amyloplast

| Replicates  | Plant organs | Number of the transcripts with different m <sup>6</sup> A sites (%) |         |         |         |         |           |
|-------------|--------------|---------------------------------------------------------------------|---------|---------|---------|---------|-----------|
|             |              | 1 site                                                              | 2 sites | 3 sites | 4 sites | 5 sites | > 5 sites |
| Replicate 1 | Leaf         | 41                                                                  | 11      | 8       | 8       | 8       | 41        |
|             | flower       | 37                                                                  | 12      | 7       | 7       | 8       | 37        |
|             | root         | 37                                                                  | 12      | 9       | 7       | 6       | 39        |
|             | Average      |                                                                     |         |         |         |         |           |
| Replicate 2 | Leaf         | 35                                                                  | 5       | 6       | 6       | 12      | 34        |
|             | flower       | 32                                                                  | 5       | 8       | 7       | 10      | 38        |
|             | root         | 30                                                                  | 5       | 7       | 7       | 11      | 32        |
|             | Average      |                                                                     |         |         |         |         |           |
