# Supplementary material for: High-throughput m6A-seq reveals RNA m6A methylation patterns in the chloroplast and mitochondria transcriptomes of Arabidopsis thaliana
Source: PubMed Central journal article supplement (PMC5683568; doi:10.1371/journal.pone.0185612), 2017-11-13
Supplement: pone.0185612.s008.pdf [file pone.0185612.s008.pdf]

**S6 Table.** Category of the modified transcripts based on the number of m<sup>6</sup>A sites per transcript in the mitochondria

| Replicates  | Plant organs | Number of the transcripts with different m <sup>6</sup> A sites (%) |         |         |         |         |           |
|-------------|--------------|---------------------------------------------------------------------|---------|---------|---------|---------|-----------|
|             |              | 1 site                                                              | 2 sites | 3 sites | 4 sites | 5 sites | > 5 sites |
| Replicate 1 | Leaf         | 18                                                                  | 1       | 4       | 11      | 7       | 18        |
|             | flower       | 21                                                                  | 5       | 4       | 11      | 7       | 20        |
|             | root         | 24                                                                  | 6       | 7       | 9       | 15      | 23        |
|             | Average      |                                                                     |         |         |         |         |           |
| Replicate 2 | Leaf         | 17                                                                  | 1       | 7       | 6       | 12      | 18        |
|             | flower       | 17                                                                  | 4       | 6       | 4       | 16      | 25        |
|             | root         | 19                                                                  | 4       | 6       | 7       | 16      | 26        |
|             | Average      |                                                                     |         |         |         |         |           |
